# Foldseek: fast and accurate protein structure search

Michel van Kempen,<sup>1,\*</sup> Stephanie S. Kim,<sup>2,\*</sup> Charlotte Tumescheit,<sup>2</sup> Milot Mirdita,<sup>1</sup>  
Cameron L.M. Gilchrist,<sup>2</sup> Johannes Söding,<sup>1,3,†</sup> and Martin Steinegger<sup>2,4,5,†</sup>

Highly accurate structure prediction methods are generating an avalanche of publicly available protein structures. Searching through these structures is becoming the main bottleneck in their analysis. Foldseek enables fast and sensitive comparisons of large structure sets. It reaches sensitivities similar to state-of-the-art structural aligners while being four to five orders of magnitude faster. Foldseek is free open-source software available at [foldseek.com](http://foldseek.com) and as a webserver at [search.foldseek.com](http://search.foldseek.com).

**Contact:** [soeding@mpinat.mpg.de](mailto:soeding@mpinat.mpg.de), [martin.steinegger@snu.ac.kr](mailto:martin.steinegger@snu.ac.kr)

1 The recent breakthrough in *in-silico* protein structure pre-  
2 diction at near-experimental quality [1, 2] is revolutionizing  
3 structural biology and bioinformatics. The European Bioin-  
4 formatics Institute already holds 1 106 829 protein structures  
5 predicted by AlphaFold2 and plans to increase this to hun-  
6 dreds of millions this year [3], with billions to be expected  
7 soon [4]. The scale of this treasure trove poses challenges to  
8 state-of-the-art analysis methods.

9 The most widely used approach to protein annotation and  
10 analysis is based on sequence similarity search [5–8]. The goal  
11 is to find homologous sequences from which properties of the  
12 query sequence can be inferred, such as molecular and cellular  
13 functions and structure. Despite the success of sequence-  
14 based homology inference, many proteins cannot be annotated  
15 because detecting distant evolutionary relationships from se-  
16 quences alone remains challenging [9].

17 Detecting similarity between protein structures by 3D su-  
18 perposition offers higher sensitivity for identifying homologous  
19 proteins [10]. The imminent availability of high-quality struc-  
20 tures for any protein of interest could allow us to use struc-  
21 ture comparison to improve homology inference and struc-  
22 tural, functional and evolutionary analyses. However, despite  
23 decades of effort to improve speed and sensitivity of struc-  
24 tural aligners, current tools are much too slow to cope with  
25 the expected scale of structure databases.

26 Searching with a single query structure through a database  
27 with 100 M protein structures would take the popular TM-  
28 align [11] tool a month on one CPU core, and an all-versus-all  
29 comparison would take 10 millennia on a 1 000 core cluster.  
30 Sequence searching is four to five orders of magnitude faster:  
31 An all-versus-all comparison of 100 M sequences would take  
32 MMseqs2 [6] only around a week on the same cluster.

33 Structural alignment tools (reviewed in [12]) are slower for  
34 two reasons. First, whereas sequence search tools employ  
35 fast and sensitive prefilter algorithms to gain orders of mag-  
36 nitude in speed, no comparable prefilters exist for structure  
37 alignment. Second, structural similarity scores are non-local:  
38 changing the alignment in one part affects the similarity in  
39 all other parts. Most structural aligners, such as the popu-

40 lar TM-align, Dali, and CE [11, 13, 14], solve the alignment  
41 optimization problem by iterative or stochastic optimization.

42 To increase speed, a crucial idea is to describe the amino  
43 acid backbone of proteins as sequences over a structural alpha-  
44 bet and compare structures using sequence alignments [15].  
45 Structural alphabets thus reduce structure comparisons to  
46 much faster sequence alignments. Many ways to discretize  
47 the local amino acid backbone have been proposed [16]. Most,  
48 such as CLE, 3D-BLAST, and Protein Blocks, discretize the  
49 conformations of short stretches of usually 3 to 5 C $\alpha$  atoms  
50 [17–19]. 3D-BLAST and CLE trained a substitution matrix  
51 for their structural alphabet and rely on an aligner like BLAST  
52 [5] to perform the sequence searches.

53 For Foldseek, we developed a novel type of structural alpha-  
54 bet that does not describe the backbone but rather tertiary  
55 interactions. The 20 states of the 3D-interactions (3Di) al-  
56 phabet describe for each residue  $i$  the geometric conformation  
57 with its spatially closest residue  $j$ . Compared to the various  
58 backbone structural alphabets, 3Di has three key advantages:  
59 First, the dependency of consecutive 3Di letters on each other  
60 is weaker than for backbone structural alphabets, where for  
61 instance a helix state is followed by another helix state with  
62 high probability. The dependency decreases information den-  
63 sity and results in high-scoring false alignments. Second, the  
64 frequencies of the 3Di states are more evenly distributed than  
65 for backbone states, for which 60 % describe generic secondary  
66 structure states. This further increases information density in  
67 3Di sequences (**Supplementary Table 1**) and decreases false  
68 positives. Third, in backbone structural alphabets, less infor-  
69 mation is contained in the highly conserved protein cores (con-  
70 sisting mostly of regular secondary structure elements) and  
71 more in the predominantly non-conserved coil/loop regions.  
72 In contrast, 3Di sequences have the highest information den-  
73 sity in conserved cores and the lowest in loop regions.

74 Foldseek (**Fig. 1a**) (1) discretizes the query structures into  
75 sequences over the 3Di alphabet and then searches through  
76 the 3Di sequences of the target structures using the double-  
77 diagonal  $k$ -mer-based prefilter and gapless alignment prefilter  
78 modules from MMseqs2, our open-source sequence search soft-  
79 ware [6]. (2) High scoring hits are aligned locally using 3Di  
80 (default) or globally with TM-align. The local alignment stage  
81 combines 3Di and amino acid substitution scores. The con-  
82 struction of the 3Di alphabet is summarized in **Fig. 1b** and  
83 **Supplemental Fig. 2-4**.

84 To minimize high-scoring false positives caused by struc-  
85 turally disordered regions and to provide reliable E-values, for  
86 each match we subtract the score of the reversed query se-

\* These two authors contributed equally

† Authors to whom correspondence should be addressed

<sup>1</sup> Quant. & Comput. Biology, Max Planck Institute for Multidisciplinary Sciences, Göttingen, Germany. <sup>2</sup> School of Biological Sciences, Seoul National University, Seoul, South Korea. <sup>3</sup> Campus-Institute Data Science (CIDAS), Goldschmidtstrasse 1, 37077 Göttingen, Germany. <sup>4</sup> Artificial Intelligence Institute, Seoul National University, Seoul, South Korea <sup>5</sup> Institute of Molecular Biology and Genetics, Seoul National University, Seoul, South Korea

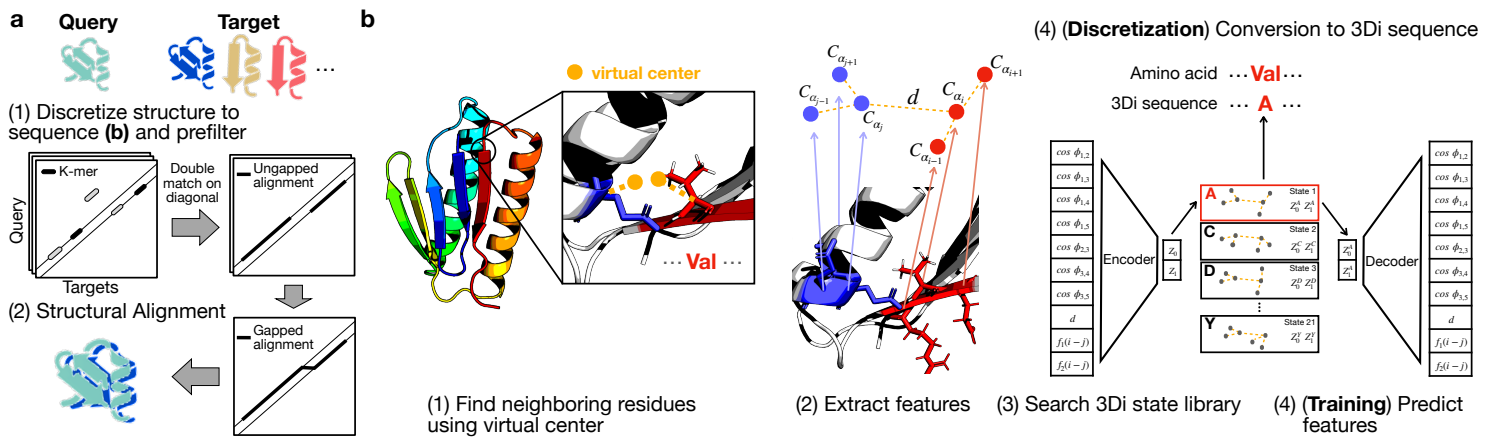

**FIG. 1. Foldseek workflow.** (a) Foldseek searches a set of query structures through a set of target structures. (1) Query and target structures are discretized into 3Di sequences (see b). To detect candidate structures, we apply the fast and sensitive  $k$ -mer and ungapped alignment prefilter of MMseqs2 to the 3Di sequences, (2) followed by vectorized Smith-Waterman local alignment combining 3Di and amino acid substitution scores. Alternatively, a global alignment is computed with a 1.7 times accelerated TM-align version (see **Supplementary Fig. 1**). (b) Learning the 3Di alphabet: (1) 3Di states describe tertiary interaction between a residue  $i$  and its nearest neighbor  $j$ . Nearest neighbors have the closest virtual center distance (yellow). Virtual center positions (**Supplementary Fig. 2**) were optimized for maximum search sensitivity. (2) To describe the interaction geometry of residues  $i$  and  $j$ , we extract seven angles, the Euclidean  $C_\alpha$  distance, and two sequence distance features from the six  $C_\alpha$  coordinates of the two backbone fragments (blue, red). (3) These 10 features are used to define 20 3Di states by training a vector-quantized variational autoencoder [20] modified to learn states that are maximally evolutionary conserved. For structure searches, the encoder predicts the best-matching 3Di state for each residue.

87 quence from the original score. Furthermore, a compositional  
88 bias correction lowers the substitution scores of 3Di states en-  
89 riched within a local 40 residue window (see “Pair-  
90 wise local structural alignments”). E-values are calculated  
91 based on an extreme-value score distribution whose param-  
92 eters are predicted by a neural network from 3Di sequence  
93 composition and query length (see “E-Values”).

94 We measured the sensitivity and speed of Foldseek, six  
95 protein structure alignment tools, an alignment-free struc-  
96 ture search tool (Geometricus [21]) and a sequence search  
97 tool (MMseqs2 [6]) on the SCOPe dataset of manually clas-  
98 sified single-domain structures [22]. Clustering SCOPe 2.01  
99 at 40% sequence identity yielded 11 211 non-redundant pro-  
100 tein sequences (“SCOPe40”). We performed an all-versus-all  
101 search and compared the tools’ performance for finding mem-  
102 bers of the same SCOPe family, superfamily, and fold (true  
103 positive matches, TPs) by measuring for each query the frac-  
104 tion of TPs out of all possible correct matches until the first  
105 false positive (FP). FPs are matches to a different fold (see  
106 “SCOPe Benchmark”). The sensitivity was measured by the  
107 area under the curve (AUC) of the cumulative ROC curve up  
108 to the first FP (**Fig. 2a**).

109 Foldseek reaches sensitivities at family and superfamily  
110 level below Dali, higher than the structural aligner CE, and  
111 similar to TM-align and TM-align-fast. Foldseek is much  
112 more sensitive than structural alphabet-based search tools 3D-  
113 BLAST and CLE-SW (**Fig. 2a-b**). Similarly, Foldseek has the  
114 second highest area under the precision-recall curve on each  
115 of the three levels (**Fig. 2c**, **Supplementary Fig. 5**). The  
116 performance is comparable across all six secondary structure  
117 classes in SCOPe (**Supplementary Fig. 6**). On this small  
118 SCOPe40 benchmark set, Foldseek is more than 4,000 times  
119 faster than TM-align and Dali, and over 21,000 times faster

120 than CE (**Fig. 2b**). On the much larger AlphaFoldDB version  
121 1 (v1), where Foldseek approaches its full speed, it is around  
122 184,600 and 23,000 faster than Dali and TM-align, respec-  
123 tively (see below). Its E-values are accurate, which is critical  
124 for homology detection (**Fig. 2d**)

125 We devised a reference-free benchmark to assess search  
126 sensitivity and alignment quality of structural aligners (see  
127 **Fig. 2e,f**) on a more realistic set of full-length, multi-domain  
128 proteins. We clustered the AlphaFoldDB (v1) to 34,270 struc-  
129 tures using BLAST and SPICi [23]. We selected randomly 100  
130 query structures from this set and aligned them against the  
131 remaining structures. TP matches are those with a Local Dis-  
132 tance Difference Test (LDDT) score [24] of at least 0.6 and FPs  
133 below 0.25, ignoring matches in-between. (For other thresh-  
134 olds and top-hit LDDT distributions, see **Supplementary**  
135 **Figs. 7,8**). LDDT measures the agreement of local residue-  
136 residue distances between two aligned structures. We set the  
137 LDDT thresholds according to the median inter- and intra-  
138 fold, -superfamily and -family LDDT scores of SCOPe40 align-  
139 ments, see **Supplementary Fig. 9**. A domain-based sensitiv-  
140 ity assessment would require a reference-based prediction of  
141 domains. To avoid it, we evaluated the sensitivity per residue.  
142 **Fig. 2e** shows the distribution of the fraction of query residues  
143 that were part of alignments with at least  $x$  TP targets with  
144 better scores than the first FP match. Again, Foldseek has  
145 similar sensitivity as Dali, CE, and TM-align and much higher  
146 than CLE-SW and MMseqs2.

147 We analyzed the quality of alignments produced by the top  
148 five matches per query. We computed the alignment sensitiv-  
149 ity as the number of TP residues divided by the query length  
150 and the precision as the number of TP residues divided by  
151 the alignment length. TP residues are those with residue-  
152 specific LDDT score above 0.6, FP residues are below 0.25,

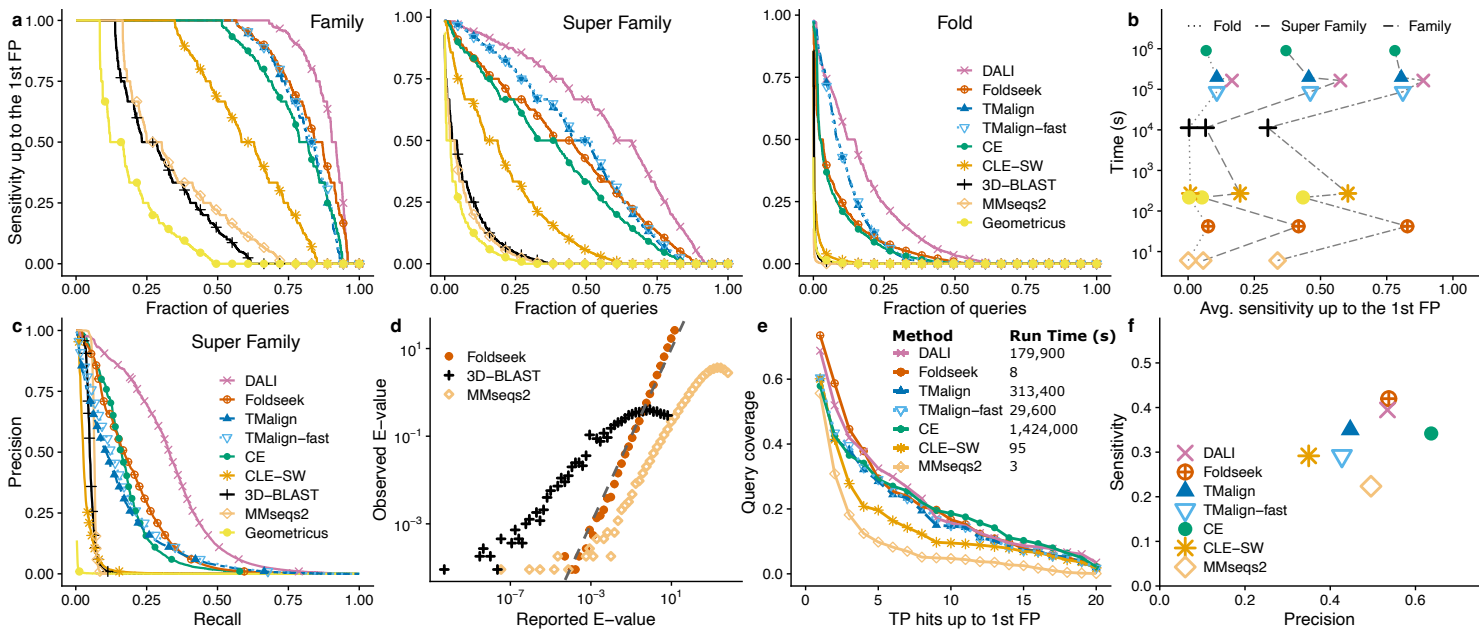

**FIG. 2. Foldseek reaches similar sensitivities as structural aligners at thousands of times their speed** (a) Cumulative distributions of sensitivity for homology detection on the SCOPe40 database of single-domain structures. True positives (TPs) are matches within the same SCOPe family, superfamily or fold, false positives (FPs) are matches between different folds. Sensitivity is the area under the ROC curve up to the first FP. (b) Avg. sensitivity up to the first FP for family, superfamily and fold versus total runtime on an AMD EPYC 7702P 64-core CPU for the all-versus-all searches of 11 211 structures of SCOPe40. (c) Precision-Recall curve of SCOPe40 superfamilies (see **Supplementary Fig. 5** for family and fold). (d) Accuracy of reported E-values: Mean number of FPs per query below the reported E-value threshold. (e) Search sensitivity on multi-domain, full-length AlphaFold2 protein models. 100 queries, randomly selected from AlfaFoldDB (v1), were searched against this database. Per-residue query coverage is the fraction of residues that are covered by at least  $x$  TP matches ranked before the first FP match. (f) Alignment quality for alignments of AlphaFoldDB (v1) protein models, averaged over the top five matches of each of the 100 queries. Sensitivity = TP residues in alignment / query length, precision = TP residues / alignment length.

153 residues with other scores are ignored. **Fig. 2f** shows the average sensitivity versus precision of the  $100 \times 5$  structure alignments. Foldseek alignments are more accurate and sensitive than MMseqs2, CLE-SW, and TM-align, similarly accurate as Dali, and 16% less precise but 23% more sensitive than CE. In a reference-based alignment quality benchmark, Foldseek performs slightly below CE, Dali, and TM-align (**Supplementary Fig. 10**).

161 To find potentially problematic high-scoring Foldseek FPs, we searched the set of unfragmented models in AlphaFoldDB (v1) with average predicted LDDT [1]  $\geq 80$  against itself. We inspected the 1,675 (of 133 813) highscoring FPs (score per aligned column  $\geq 1.0$ , TM-score  $< 0.5$ ), revealing queries with multiple segments correctly folded by AlphaFold2 but with incorrect relative orientations (**Supplementary Table 2, Supplementary Fig. 11**). The segments were correctly aligned by Foldseek. This illustrates that 3D aligners as TM-align may overlook homologous structures that are not globally superposable, whereas the 1D aligner Foldseek (as the 2D aligner Dali) is independent of relative domain orientations and excels at detecting homologous multi-domain structures [12].

174 We developed a webserver that can search through four structure databases, AlphaFoldDB (Uniprot50, Proteome, Swiss-Prot) and PDB100, using as alignment method standard Foldseek (default) or TM-align. The server takes PDB files as input and returns a list of

179 matched structures, sequence alignments, bit-scores, E-values or TM-scores, and 3D structural alignments.

180 We compared the Foldseek webserver with TM-align and Dali by searching with the SARS-CoV-2 RNA-dependent RNA polymerase (RdRp, PDB: 6M71\_A [25]; 942 residues) through the AlphaFoldDB (Proteome+Swiss-Prot) containing 804 872 structures. On a single CPU core, the search took 10 days with Dali, 33h with TM-align, and 5s with Foldseek, 23 000 or 180 000 times faster. The 10 top hits of Foldseek, TM-align, and DALI are to reverse transcriptases and kinases, which are known homologs (**Supplementary Table 3**). We have included the new Uniprot/AlphaFold (version 3) database clustered to 50% sequence identity, with 52,327,413 million models, which Foldseek can search in 90 seconds per 300-residue query structure using a single core.

194 The availability of high-quality structures for nearly every folded protein is going to be transformative for biology and bioinformatics. Sequence-based analyses will soon be largely superseded by structure-based analyses. The main limitation in our view, the four orders of magnitude slower speed of structure comparisons, is removed by Foldseek.

## REFERENCES

- 201 [1] Jumper, J. *et al. Nature* **596**, 583–589 (2021).  
 202 [2] Baek, M. *et al. Science* **373**, 871–876 (2021).

- 203 [3] Varadi, M. *et al. Nucleic Acids Res* **50**, D439–D444 (2022).  
204 [4] Burley, S. K. *et al. Nucleic Acids Res* **49**, D437–D451 (2021).  
205 [5] Altschul, S. F. *et al. J Mol Biol* **215**, 403–410 (1990).  
206 [6] Steinegger, M. & Söding, J. *Nat Biotechnol* **35**, 1026–1028  
207 (2017).  
208 [7] Steinegger, M. *et al. BMC Bioinform* **20**, 473 (2019).  
209 [8] Buchfink, B. *et al. Nat Methods* **18**, 366–368 (2021).  
210 [9] Mahlich, Y. *et al. Bioinformatics* **34**, i304–i312 (2018).  
211 [10] Illergård, K. *et al. Proteins* **77**, 499–508 (2009).  
212 [11] Zhang, Y. & Skolnick, J. *Nucleic Acids Res* **33**, 2302–2309  
213 (2005).  
214 [12] Hasegawa, H. & Holm, L. *Curr Opin Struct Biol* **19**, 341–348  
215 (2009).  
216 [13] Holm, L. *Methods Mol Biol* **2112**, 29–42 (2020).  
217 [14] Shindyalov, I. N. & Bourne, P. E. *Protein Eng Des Sel* **11**,  
218 739–747 (1998).  
219 [15] Guyon, F. *et al. Nucleic Acids Res* **32**, W545–W548 (2004).  
220 [16] Ma, J. & Wang, S. *Adv Protein Chem Struct Biol* **94**, 121–175  
221 (2014).  
222 [17] Wang, S. & Zheng, W.-M. *J Bioinform Comput Biol* **6**, 347–  
223 366 (2008).  
224 [18] Yang, J.-M. & Tung, C.-H. *Nucleic Acids Res* **34**, 3646–3659  
225 (2006).  
226 [19] de Brevern, A. G. *et al. Proteins* **41**, 271–287 (2000).  
227 [20] Van den Oord, A. *et al. Adv Neur Inf Proc Syst (NIPS)* **30**  
228 (2017).  
229 [21] Durairaj, J. *et al. Bioinformatics* **36**, i718–i725 (2020).  
230 [22] Chandonia, J.-M. *et al. Nucleic Acids Res* **47**, D475–D481  
231 (2019).  
232 [23] Jiang, P. & Singh, M. *Bioinformatics* **26**, 1105–1111 (2010).  
233 [24] Mariani, V. *et al. Bioinformatics* **29**, 2722–2728 (2013).  
234 [25] Gao, Y. *et al. Science* **368**, 779–782 (2020).

#### Acknowledgements

236 We thank Nicola Bordin, Ian Sillitoe and Christine Orengo  
237 for reporting issues and providing valuable feedback, Yang  
238 Zhang, Piotr Rotkiewicz and Marcin Wojdyr for making TM-  
239 align, PULCHRA and the Gemmi library freely accessible, and  
240 Do-Yoon Kim for creating the Foldseek logo.

241 M.S. acknowledges support from the National Re-  
242 search Foundation of Korea (NRF), grants [2019R1A6A1-  
243 A10073437, 2020M3A9G7103933, 2021R1C1C102065, 2021-  
244 M3A9I4021220], Samsung DS research fund and the Creative-  
245 Pioneering Researchers Program through Seoul National Uni-  
246 versity. S.K. acknowledges support by NRF grant 2019R1-  
247 A6A1A10073437. J.S. acknowledges support by the Ger-  
248 man ministry for education and research (BMBF) (horizon-  
249 tal4meta). We used the compute cluster at the GWDG in  
Göttingen.

#### Author contributions

252 M.K., S.K., J.S. & M.S. designed research. M.K., S.K.,  
253 C.T., & M.S. developed code and performed analyses. M.K.  
254 and J.S. developed the 3Di alphabet. M.M. and C.L.M.G.  
255 developed the webserver. M.K., S.K., C.T., M.M., J.S. &  
256 M.S. wrote the manuscript.

#### Competing financial interests

257 The authors declare no competing financial interests.  
258

## METHODS

259

260 **Overview** Foldseek enables fast and sensitive comparison of  
261 large structure sets. It encodes structures as sequences over  
262 the 20-state 3Di alphabet and thereby reduces structural align-  
263 ments to 3Di sequence alignments. The 3Di alphabet devel-  
264 oped for Foldseek describes tertiary residue-residue interac-  
265 tions instead of backbone conformations and proved critical  
266 for reaching high sensitivities. Foldseek’s prefilter finds two  
267 *similar*, spaced 3Di *k*-mer matches in the same diagonal of  
268 the dynamic programming matrix. By not restricting itself to  
269 exact matches, the prefilter achieves high sensitivity while re-  
270 ducing the number of sequences for which full alignments are  
271 computed by several orders of magnitude. Further speed-ups  
272 are achieved by multi-threading and utilizing single instruction  
273 multiple data (SIMD) vector units. Owing to the SIMDe li-  
274 brary ([github.com/simd-everywhere/simde](https://github.com/simd-everywhere/simde)), Foldseek runs on  
275 a wide range of CPU architectures (x86\_64, arm64, ppc64le)  
276 and operating systems (Linux, macOS). The core modules of  
277 Foldseek, which build on the MMseqs2 framework [26], are de-  
278 scribed in the following paragraphs.

279 **Create database** The `createdb` module converts a set of  
280 Protein Data Bank (PDB; [27]) or macromolecular Crystal-  
281 lographic Information File (mmCIF) formatted files into an  
282 internal Foldseek database format using the gemmi package  
283 ([project-gemmi.github.io](https://project-gemmi.github.io)). The format is compatible with  
284 the MMseqs2 database format, which is optimized for paral-  
285 lel access. We store each chain as a separate entry in the  
286 database. The module follows the MMseqs2 `createdb` mod-  
287 ule logic. However, in addition to the amino acid sequence it  
288 computes the 3Di sequence from the 3D atom coordinates of  
289 the backbone atom and  $C_\beta$  coordinates (see “Descriptors for  
290 3Di structural alphabet” and “Optimize nearest-neighbor se-  
291 lection”). Backbone atom and  $C_\beta$  coordinates are only needed  
292 for the nearest-neighbor selection. For  $C_\alpha$ -only structures,  
293 Foldseek reconstructs backbone atom coordinates using PUL-  
294 CHRA [28]. Missing  $C_\beta$  coordinates (e.g. in glycines) are  
295 defined such that the four groups attached to the  $C_\alpha$  are ar-  
296 ranged at the vertices of a regular tetrahedron. The 3Di and  
297 amino acid sequences and the  $C_\alpha$  coordinates are stored in the  
298 Foldseek database.

299 **Prefilter** The `prefilter` module detects double matches of  
300 similar spaced words (k-mers) that occur on the same diag-  
301 onal. The k-mer size is  $k = 6$  by default. Similar k-mers are  
302 those with a 3Di substitution matrix score above a certain  
303 threshold, whereas MMseqs2 uses the Blosum62 substitution  
304 matrix to compute the similarity. (see “3Di substitution score  
305 matrix”). The gapless double-match criterion suppresses hits  
306 to non-homologous structures effectively, as they are less likely  
307 to have consecutive k-mer matches on the same diagonal by  
308 chance. To avoid FP matches due to regions with biased 3Di  
309 sequence composition, a compositional bias correction is ap-  
310 plied in a way analogous to MMseqs2 [29]. For each hit we  
311 perform an ungapped alignment over the diagonals with dou-  
312 ble, consecutive, similar k-mer matches and sort those by the  
313 maximum ungapped diagonal score. Alignments with a score  
314 of at least 15 bits are passed on to the next stage.

315 **Pairwise local structural alignments** After the prefilter  
316 has removed the vast majority of non-homologous sequences,  
317 the `structurealign` module computes pairwise alignments  
318 for the remaining sequences using a SIMD accelerated Smith-  
319 Waterman algorithm [30, 31]. We extended this implementa-  
320 tion to support amino acid and 3Di scoring, compositional bias  
321 correction, and 256-bit-wide vectorization. The score linearly  
322 combines amino acid and 3Di substitution scores with weights  
323 1.4 and 2.1, respectively. We optimized these two weights and  
324 the ratio of gap-extend to gap open-penalty on  $\sim 1\%$  of align-  
325 ments (all-versus-all on 10% of randomly selected SCOPe40  
326 domains). A compositional bias correction is applied to the  
327 amino acid and 3Di scores. To further suppress high-scoring  
328 FP matches, for each match we align the reversed query se-  
329 quence against the target and subtract the reverse score from  
330 the forward score.

331 **E-Values** To estimate E-values for each match, we trained  
332 a neural network to predict the mean  $\mu$  and scale parameter  
333  $\lambda$  of the extreme value distribution for each query. Module  
334 `computemulambda` takes a query and database structures as  
335 input and aligns the query against a randomly shuffled ver-  
336 sion of the database sequences. For each query sequence the  
337 module produces  $N$  random alignments and fits to their scores  
338 an extreme-value (Gumbel) distribution. The maximum like-  
339 lihood fitting is done using the Gumbel fitting function taken  
340 from HMMER3 (`hmmcalibrate`) [32]. To train the neural net-  
341 work, it is critical to use query and target proteins that include  
342 problematic regions such as structurally biased, disordered, or  
343 badly modeled regions that occur ubiquitously in full-length  
344 proteins or modeled structures. We therefore trained the net-  
345 work on 100 000 structures sampled from the AlphaFoldDB  
346 (v1). We trained a neural network to predict  $\mu$  and  $\lambda$  from  
347 the amino acid composition of the query and its length (so a  
348 scrambled version of the query sequence would produce the  
349 same  $\mu$  and  $\lambda$ ). The network has 22 input nodes, 2 fully-  
350 connected layers with 32 nodes each (ReLU activation) and  
351 two linear output nodes. The optimizer ADAM with learning  
352 rate 0.001 was used for training. When testing the resulting  
353 E-values on searches with scrambled sequences, the log of the  
354 mean number of FPs per query turned out to have an accu-  
355 rately linear dependence on the log of the reported E-values,  
356 albeit with a slope of 0.32 instead of 1. We therefore correct  
357 the E-values from the neural network by taking them to the  
358 power of 0.32. We compared how well the mean number of  
359 FPs at a given E-value agreed with the E-values reported by  
360 Foldseek, MMseqs2, and 3D-Blast, (**Fig. 2d** for SCOPe40 and  
361 **Supplementary Fig. 12** for AlphaFoldDB). We considered a  
362 hit as FP if it was in a different fold and had a TM-score lower  
363 than 0.3. Furthermore, we ignored all cross-fold hits within the  
364 four- to eight-bladed  $\beta$ -propeller superfamilies (SCOPe b.66-  
365 b.70) and within the Rossman-like folds (c.2-c.5, c.27, c.28,  
366 c.30, and c.31) because of the extensive cross-fold homologies  
367 within these groups [33].

368 **Pairwise global structural alignments using TM-align**  
369 We also offer the option to use TM-align for pairwise struc-  
370 ture alignment instead of the 3Di-based alignment. We im-  
371 plemented TM-align based on the  $C_\alpha$  atom coordinates and  
372 made adjustments to improve the (1) speed and (2) memory

usage. (1) TM-align performs multiple floating-point based Needleman-Wunsch (NW) alignment steps, while applying different scoring functions (e.g., score secondary structure, Euclidean distance of superposed structures or fragments, etc.) TM-align’s NW code did not take advantage of SIMD instructions, therefore, we replaced it by parasail’s [34] SIMD-based NW implementation and extended it to support the different scoring functions. We also replaced the TM-score computation using fast\_protein\_cluster’s SIMD based implementation [35]. Our NW implementation does not compute exactly the same alignment since we apply affine gap costs while TM-align does not (**Supplementary Fig. 1**). (2) TM-align requires 17 bytes  $\times$  query length  $\times$  target length of memory, we reduce the constant overhead from 17 to 4 bytes. If Foldseek is used in TM-align mode (parameter `--alignment-type 1`), we replace the reported E-value column with TM-scores normalized by the query length. The results are ordered in descending order by TM-score.

**Descriptors for 3Di structural alphabet** The 3Di alphabet describes the tertiary contacts between residues and their nearest neighbors in 3D space. For each residue  $i$  the conformation of the local backbone around  $i$  together with the local backbone around its nearest neighbor  $j$  is approximated by 20 discrete states (see **Supplementary Fig. 4**). We chose the alphabet size  $A=20$  as a trade-off between encoding as much information as possible (large  $A$ , see **Supplementary Fig. 13**) and limiting the number of similar 3Di  $k$ -mers that we need to generate in the  $k$ -mer based prefilter, which scales with  $A^k$ . The discrete single-letter states are formed from neighborhood descriptors containing ten features encoding the conformation of backbones around residues  $i$  and  $j$  represented by the  $C_\alpha$  atoms ( $C_{\alpha,i-1}, C_{\alpha,i}, C_{\alpha,i+1}$ ) and ( $C_{\alpha,j-1}, C_{\alpha,j}, C_{\alpha,j+1}$ ). The descriptors use the five unit vectors along the following directions,

$$\begin{aligned} u_1 : C_{\alpha,i-1} &\rightarrow C_{\alpha,i} & u_4 : C_{\alpha,j} &\rightarrow C_{\alpha,j+1} \\ u_2 : C_{\alpha,i} &\rightarrow C_{\alpha,i+1} & u_5 : C_{\alpha,i} &\rightarrow C_{\alpha,j} \\ u_3 : C_{\alpha,j-1} &\rightarrow C_{\alpha,j} & & \end{aligned}$$

We define the angle between  $u_k$  and  $u_l$  as  $\phi_{kl}$ , so  $\cos \phi_{kl} = u_k^T u_l$ . The seven features  $\cos \phi_{12}, \cos \phi_{34}, \cos \phi_{15}, \cos \phi_{35}, \cos \phi_{14}, \cos \phi_{23}, \cos \phi_{13}$ , and the distance  $|C_{\alpha,i} - C_{\alpha,j}|$  describe the conformation between the backbone fragments. In addition, we encode the sequence distance with the two features  $\text{sign}(i-j) \min(|i-j|, 4)$  and  $\text{sign}(i-j) \log(|i-j| + 1)$ .

**Learning the 3Di states using a VQ-VAE** The ten-dimensional descriptors were discretized into an alphabet of 20 states using a variational autoencoder with vector-quantized latent variables (VQ-VAE) [36]. In contrast to standard clustering approaches such as k-means, VQ-VAE is a nonlinear approach that can optimize decision surfaces for each of its states. In contrast to the standard VQ-VAE, we trained the VQ-VAE not as a simple generative model but rather to learn states that are maximally conserved in evolution. To that end, we trained it with pairs of descriptors  $\mathbf{x}_n, \mathbf{y}_n \in \mathbb{R}^{10}$  from structurally aligned residues, to predict the distribution of  $\mathbf{y}_n$  from  $\mathbf{x}_n$ .

The VQ-VAE consists of an encoder and decoder network

with the discrete latent 3Di state as a bottleneck in-between. The encoder network embeds the 10-dimensional descriptor  $\mathbf{x}_n$  into a two-dimensional continuous latent space, where the embedding is then discretized by the nearest centroid, each centroid representing a 3Di state. Given the centroid, the decoder predicts the probability distribution of the descriptor  $\mathbf{y}_n$  of the aligned residue. After training, only encoder and centroids are used to discretize descriptors. Encoder and decoder networks are both fully connected with two hidden layers of dimension 10, a batch normalization after each hidden layer and ReLU as activation functions. The encoder, centroids, and decoder have 242, 40, and 352 parameters, respectively. The output layer of the decoder consists of 20 units predicting  $\mu$  and  $\sigma^2$  of the descriptors  $x$  of the aligned residue, such that the decoder predicts  $\mathcal{N}(x|\mu, I\sigma^2)$  (with diagonal covariance).

We trained the VQ-VAE on the loss function defined in Equation (3) in [36] (with commitment loss = 0.25) using the deep-learning framework PyTorch (version 1.9.0), the ADAM optimizer, with a batch size of 512, and a learning rate of  $10^{-3}$  over 4 epochs. Using Kerasify, we integrated the encoder network into Foldseek. The domains from SCOPe40 were split 80%/20% by fold into training and validation sets. For the training, we aligned the structures with TM-align, removed all alignments with a TM-score below 0.6, and removed all aligned residue pairs with a distance between their  $C_\alpha$  atoms of more than 5 Å. We trained the VQ-VAE with 100 different initial parameters and chose the model that was performing best in the benchmark on the validation dataset (the highest sum of ratios between 3Di AUC and TM-align AUC for family, superfamily and fold level).

**3Di substitution score matrix** We trained a BLOSUM-like substitution matrix for 3Di sequences from pairs of structurally aligned residues used for the “VAE-VQ training”. First, we determined the 3Di states of all residues. Next, the substitution frequencies between 3Di states were calculated by counting how often two 3Di states were structurally aligned. (Note that the substitution frequencies from state A to B and the opposite direction are equal.) Finally, the score  $S(x, y) = 2 \log_2 \frac{p(x, y)}{p(x)p(y)}$  for substituting state  $x$  through state  $y$  is the log-ratio between the substitution frequency  $p(x, y)$  and the probability that the two states occur independently, scaled by the factor 2.

**3Di alphabet cross-validation** We trained the 3Di alphabet (the VQ-VAE weights) and the substitution matrix by four-fold cross-validation on SCOPe40. We split the SCOPe40 dataset into four parts, such that all domains of each fold ended up in the same part of the four parts. 3Di alphabets were trained on three parts and tested on the remaining part, selecting each of the four parts in turn as a test set. The 80:20 split between training and validation sets to select the best alphabet out of the 100 VQ-VAE runs happens within the 3/4 of the cross-validation training data. **Supplementary Fig. 14** shows the mean sensitivity (black) and the standard deviation (gray area) in comparison to the final 3Di alphabet, for which we trained the 3Di alphabet on the entire SCOPe40 (red). No overfitting was observed, despite training 492 parameters (282 neural network, 210 substitution matrix entries). In **Fig. 2** we therefore show the benchmark results for the final 3Di al-

phabet, trained on the entire SCOPe40.

**Nearest-neighbor selection** To select nearest-neighbor residues that maximize the performance of the resulting 3Di alphabet in finding and aligning homologous structures, we introduced the virtual center  $V$  of a residue. The virtual center position is defined by the angle  $\theta$  ( $V-C_\alpha-C_\beta$ ), the dihedral angle  $\tau$  ( $V-C_\alpha-C_\beta-N$ ), and the length  $l$  ( $|V-C_\alpha|$ ) (**Supplementary Fig. 2**). For each residue  $i$  we selected the residue  $j$  with the smallest distance between their virtual centers. The virtual center was optimized on the training and validation structure sets used for the VQ-VAE training by creating alphabets for positions with  $\theta \in [0, 2\pi]$ ,  $\tau \in [-\pi, \pi]$  in  $45^\circ$  steps, and  $l \in \{1.53\text{\AA} k : k \in \{1, 1.5, 2, 2.5, 3\}\}$  ( $1.53\text{\AA}$  is the distance between  $C_\alpha$  and  $C_\beta$ ). The virtual center defined by  $\theta = 270^\circ$ ,  $\tau = 0^\circ$  and  $l = 2$  performed best in the SCOPe benchmark.

This virtual center preferably selects long-range, tertiary interactions and only falls back to selecting interactions to  $i+1$  or  $i-1$  when no other residues are nearby. In that case, the interaction captures only the backbone conformation.

**SCOPe benchmark** We downloaded SCOPe40 structures for the generation of 3Di states and for the performance evaluation of Foldseek.

The SCOPe benchmark set consists of single domains with an average length of 174 residues. In our benchmark, we compare the domains all-versus-all. Per domain, we measured the fraction of detected TPs up to the first FP. For family-, superfamily- and fold-level recognition, TPs were defined as same family, same superfamily and not same family, and same fold and not same superfamily, respectively. Hits from different folds are FPs.

**Evaluation SCOPe benchmark** In order to evaluate the sensitivity and precision of the structural alignment tools, we used a cumulative ROC curve analysis. After sorting the alignment result of each query (described in Tools and options for benchmark comparison section), we calculated the fraction of TPs in the list up to the first FP, all excluding self-hits. We quantitatively measured the sensitivity by comparing the AUC for family-, superfamily-, and fold-level classifications. We evaluated only SCOPe members with at least one other family, superfamily and fold member.

Additionally, we plotted precision-recall curves for each tool (**Fig. 2c, Supplementary Fig. 5**). After sorting the alignment results by the structural similarity scores (as described in Tools and options for benchmark comparison section) and excluding self-matches, we generated a weighted precision-recall curve for family-, superfamily-, and fold-level classifications (precision=TP/(TP+FP), recall=TP/(TP+FN)). All counts (TP, FP, FN) were weighted by the reciprocal of their family-, superfamily-, or fold size. In this way, folds, superfamilies, and families contribute linearly with their size instead of quadratically [33].

**Runtime evaluations on SCOPe and AlphaFoldDB** We measured the speed of structural aligners on a server with an AMD EPYC 7702P 64-core CPU and 1024 GB RAM memory. On SCOPe40, we measured or estimated the runtime for an all-versus-all comparison. To avoid excessive runtimes for TM-align, Dali, and CE, we estimated the runtime by randomly selecting 10% of the 11 211 SCOPe domains as queries.

We measured runtimes on AlphaFoldDB for searches with the same 100 randomly selected queries used for the sensitivity and alignment quality benchmarks (**Fig. 2e,f**). Tools with multi-threading support (MMseqs2 and Foldseek) were executed with 64 threads, tools without were parallelized by breaking the query set into 64 equally sized chunks and executing them in parallel.

**Reference-free multi-domain benchmarks** Benchmarking using domain annotation from SCOPe/CATH of multi-domain proteins is problematic. Labeling the domains requires a gold-standard, reference annotation tool. The issue is that the benchmark would be uncontrollably biased in favor of tools that optimize similar alignment metrics or even make similar mistakes as the reference tool used for annotation. False negatives of the annotation tool would give rise to numerous high-scoring FPs for more sensitive or dissimilar tools.

We therefore devised two reference-free benchmarks that do not rely on any reference structural alignments. We clustered the AlphaFoldDB (v1) [37] using SPiCi [38]. For this we first aligned all protein sequences all against all using an E-value threshold  $< 10^{-3}$  using BLAST (2.5.0+) [39]. SPiCi produced 34,270 clusters from the search result. For each cluster we picked the longest protein as representative. We randomly selected 100 representatives as queries and searched the set of remaining structures. The top five alignments of all queries are listed at [wwwuser.gwdg.de/~compbiol/foldseek/multi\\_domain\\_top5\\_alignments/](http://wwwuser.gwdg.de/~compbiol/foldseek/multi_domain_top5_alignments/).

For the evaluation, we needed to adjust the LDDT score function taken from AlphaFold2 [40]. LDDT calculates for each residue  $i$  in the query the fraction of residues in the  $15\text{\AA}$  neighborhood which have a distance within 0.5, 1, 2, or  $4\text{\AA}$  of the distance between the corresponding residues in the target [41]. The denominator of the fraction is the number of  $15\text{\AA}$ -neighbors of  $i$  that are aligned to some residue in the target. This does not properly penalize non-compact models in which each residue has few neighbors within  $15\text{\AA}$ . We therefore use as denominator the *total* number of neighboring residues within  $15\text{\AA}$  of  $i$ .

For the alignment quality benchmark (**Fig. 2f**), we classified each aligned residue pair as TP or FP depending on its *residue-wise* LDDT score, that is, the fraction of distances to its  $15\text{\AA}$  neighbors that are within 0.5, 1, 2, and  $4\text{\AA}$  of the distance to the corresponding residues in the query, averaged over the four distance thresholds. TP residues are those with a residue-wise LDDT score of at least 0.6 and FPs below 0.25, ignoring matches in-between. For the sensitivity benchmark (**Fig. 2e**), TP residue-residue matches are those with an LDDT score of the query-target alignment of at least 0.6 and FPs below 0.25, ignoring matches in-between. (The LDDT score of the query-target alignment is the average of the residue-wise LDDT score over all aligned residue pairs.) The choice of thresholds is illustrated in **Supplementary Fig. 8**.

**All-vs-all search of AlphaFoldDB with Foldseek** We downloaded the AlphaFoldDB (v1) [37] containing 365,198 protein models and searched it all-versus-all using Foldseek `-s 9.5 --max-seqs 2000`. For our second best hit analysis we consider only models with: (1) an average  $C_\alpha$ 's pLDDT

greater than or equal to 80, and (2) models of non-fragmented domains. We also computed the structural similarity for each pair using TM-align (default options).

**Tools and options for benchmark comparison** The following command lines were used in the SCOPE as well as the multi-domain benchmark:

**Foldseek** We used Foldseek commit 4de45 during this analysis. Foldseek was run with the following parameters: `--threads 64 -s 9.5 -e 10 --max-seqs 2000`

**MMseqs2** We used the default MMseqs2 (release 13-45111) search algorithm to obtain the sequence-based alignment result. MMseqs2 sorts the results by e-value and score. We searched with: `--threads 64 -s 7.5 -e 10000 --max-seqs 2000`

**CLE-Smith-Waterman** We used PDB Tool v4.80 ([github.com/realbigws/PDB\\_Tool](https://github.com/realbigws/PDB_Tool)) to convert the benchmark structure set to CLE sequences. After the conversion, we used SSW [31] (commit ad452e) to align CLE sequences all-versus-all. We sorted the results by alignment score. The following parameters were used to run SSW: (1) protein alignment mode (`-p`), (2) gap open penalty of 100 (`-o 100`), (3) gap extend penalty of 10 (`-e 10`), (4) CLE's optimized substitution matrix (`-a cle.shen.mat`), (5) returning alignment (`-c`). The gap open and extend values were inferred from DeepAlign [42]. The results are sorted by score in descending order.

```
ssw_test -p -o 100 -e 10 -a cle.shen.mat -c
```

**3D-BLAST** We used 3D-BLAST (beta102) with BLAST+ (2.2.26) and SSW [31] (version ad452e). We first converted the PDB structures to a 3D-BLAST database using `3d-blast -sq_write` and `3d-blast -sq_append`. We searched the structural sequences against the database using `blastp` with the following parameters: (1) we used 3D-BLAST's optimized substitution matrix (`-M 3DBLAST`), (2) number of hits and alignments shown of 12000 (`-v 12000 -b 12000`), (3) E-value threshold of 1000 (`-e 1000`) (4) disabling query sequence filter (`-F F`) (5) gap open of 8 (`-G 8`), and (6) gap extend of 2 (`-E 2`). 3D-BLAST's results are sorted by E-value in ascending order:

```
blastall -p blastp -M 3DBLAST -v 12000 -b 12000 -e 1000 -F F -G 8 -E 2
```

For Smith-Waterman we used (1) gap open of 8 (2) gap extend of 2 and (3) returning alignments (`-c`) (4) using the 3D-BLAST's optimized substitution matrix (`-a 3DBLAST`), (5) protein alignment mode (`-p`): `ssw_test -o 8 -e 2 -c -a 3DBLAST -p`. We noticed that the 3D-BLAST matrix with Smith-Waterman resulted in a similar performance to CLE: 0.717 0.230 0.011 for family-, superfamily- and fold-classification, respectively. We excluded 3D-BLAST's measurement from the multi-domain benchmark since it produced occasionally high-scores ( $>10^7$ ) for single residue alignments.

**TM-align** We downloaded and compiled the `TMalign.cpp` source code (version 2019/08/22) from the Zhang group website. We ran the benchmark using default parameters and `-fast` for the fast version. TM-align reports two TM-scores: (1) normalized by the length of 1st chain (query) or (2)

normalized by the length of the 2nd chain (target). We used the TM-score normalized by the 1st chain (query) in all our analyses since, to be informative for searches with multi-domain proteins, we need to assess how well and how much of the query is aligned, not how well and how much of the target.

```
Default: TMalign query.pdb target.pdb
```

```
Fast: TMalign query.pdb target.pdb -fast
```

**Dali** We installed the standalone DaliLite.v5. For the SCOPE40 benchmark set, input files were formatted in DAT files with Dali's `import.pl`. The conversion to DAT format produced 11137 valid structures out of the 11211 initial structures for the SCOPE benchmark, and 34,252 structures out of 34,270 spici clusters. After formatting the input files, we calculated the protein alignment with Dali's structural alignment algorithm. The results were sorted by Dali's Z-score in descending order:

```
import.pl -pdbfile query.pdb -pdbname PDBid -dat DAT
dali.pl -cd1 queryDATid -db targetDB.list -TITLE
systematic -dat1 DAT -dat2 DAT -outfmt "summary"
-clean
```

**CE** We used BioJava's [43] (version 5.4.0) implementation of the combinatorial extension (CE) alignment algorithm. We modified one of the modules of BioJava under shape configuration to calculate the CE value. Our modified `CEalign.jar` file requires a list of query files, path to the target PDB files, and an output path as input parameters. This Java module runs an all-versus-all CE calculation, with unlimited gap size (`maxGapSize -1`) to improve alignment results [44]. The results were sorted by Z-score in descending order. For the multi-domain benchmark, we excluded 1 query that was running over 16 days. The Jar file of our implementation of CE calculation is provided.

```
java -jar CEalign.jar querylist.txt
TargetPDBDirectory OutputDirectory
```

**Geometricus** We included Geometricus [45] in the SCOPE benchmark as a representative of alignment-free tools. Geometricus discretizes fixed-length backbone fragments (shape-mers) using their 3D moment invariants and represents structures as a fixed-length count vector over the shape-mers. To calculate the shape-mer-based structural similarity of the benchmark set, we used Caretta-shape's Python implementation of multiple structure alignment ([github.com/TurtleTools/caretta/caretta/multiple\\_alignment.py](https://github.com/TurtleTools/caretta/caretta/multiple_alignment.py)), which computes the BrayCurtis similarity between the Geometricus shape-mer vectors. Our modified version extracts structural information from the input files and generates all-versus-all pairwise structural similarity score as an output. The python code of our implementation of Geometricus is provided.

```
python runGeometricus_caretta.py -i querylist.txt
-o OutputDirectory
```

**HOMSTRAD alignment benchmark** The HOMSTRAD database contains expert-curated homologous structural alignments for 1032 protein families [46]. We downloaded the latest HOMSTRAD version ([mizuguchilab.org/homstrad/data/homstrad\\_with\\_PDB\\_2022\\_Aug\\_1.tar.gz](https://mizuguchilab.org/homstrad/data/homstrad_with_PDB_2022_Aug_1.tar.gz)) and picked



714 the pairwise alignments between the first and last members of  
715 each family, which resulted in structures of a median length  
716 of 182 residues. We used the same parameters as in the  
717 SCOPe and multi-domain benchmark. We forced Foldseek,  
718 MMseqs2, and CLE-Smith-Waterman to return an alignment  
719 by switching off the prefilter and E-value threshold. With  
720 the HOMSTRAD alignments as reference, we measured for  
721 each pairwise alignment the sensitivity (fraction of residue  
722 pairs of the HOMSTRAD alignment that were correctly  
723 aligned) and the precision (fraction of correctly aligned  
724 residue pairs in the predicted alignment). Dali, CE and  
725 CLE-Smith-Waterman failed to produce an alignment for  
726 35, 1 and 1 out of 1032 pairs respectively, which were rated  
727 with a sensitivity of zero. The mean sensitivity and precision  
728 are shown in **Supplementary Fig. 10** and all individual  
729 alignments are listed in `homstrad_alignments.txt` at  
730 [wwwuser.gwdg.de/~compbiol/foldseek/](http://wwwuser.gwdg.de/~compbiol/foldseek/).

731 **Webserver** The Foldseek webserver is based on the MM-  
732 seqs2 webserver [47]. To allow for searches in seconds we  
733 implemented MMseqs2's pre-computed database indexing  
734 capabilities in Foldseek. Using these, the search databases  
735 can be fully cached in system memory by the operating  
736 system and instantly accessed by each Foldseek process,  
737 thus avoiding expensive accesses to slow disk drives. A  
738 similar mechanism was used to store and read the associated  
739 taxonomic information. The AlphaFoldDB/Uniprot50 (v3),  
740 AlphaFoldDB/Proteome (v2), AlphaFoldDB/Swiss-Prot (v2),  
741 and PDB100 require 459GB, 7.7GB, 5.5GB, and 3.7GB  
742 RAM, respectively. If  $C_{\alpha}$  coordinates are omitted from the  
743 AlphaFoldDB/Uniprot50 (v3) then the database can be used  
744 with 304GB RAM. The databases are kept in memory using  
745 `vmtouch` ([github.com/hoytech/vmtouch](https://github.com/hoytech/vmtouch)). Databases are  
746 only required to remain resident in RAM, if Foldseek is used  
747 as a webserver. During batch searches, Foldseek adapts  
748 its memory use to the available RAM of the machine. We  
749 implemented a structural visualization using the NGL viewer  
750 [48] to aid the investigation of pairwise hits. Since we only  
751 store  $C_{\alpha}$  traces of the database proteins, we use PULCHRA  
752 [28] to complete the backbone of these sequences, and also  
753 of the query if necessary, to enable a ribbon visualization  
754 [49] of the proteins. For a high quality superposition we  
755 use TM-align [50] to superpose the structures based on the  
756 Foldseek alignment. Both PULCHRA and TM-align are  
757 executed within the users' browser using WebAssembly. They  
758 are available as `pulchra-wasm` and `tmalign-wasm` on the  
759 npm package repository as free open-source software.

760 **Code availability** Foldseek is GPLv3-licensed free open  
761 source software. The source code and binaries for Foldseek can  
762 be downloaded at [github.com/steineggerlab/foldseek](https://github.com/steineggerlab/foldseek).  
763 The webserver code is available at [github.com/soedinglab/mmseqs2-app](https://github.com/soedinglab/mmseqs2-app).  
764 The analysis scripts are available at:  
765 [github.com/steineggerlab/foldseek-analysis](https://github.com/steineggerlab/foldseek-analysis).

766 **Data availability** Benchmark data is available at:  
767 [wwwuser.gwdg.de/~compbiol/foldseek](http://wwwuser.gwdg.de/~compbiol/foldseek)

## REFERENCES

- 768  
769 [26] Steinegger, M. & Söding, J. *Nat Biotechnol* **35**, 1026–1028  
770 (2017).  
771 [27] Burley, S. K. *et al. Nucleic Acids Res* **47**, D520–D528 (2019).  
772 [28] Rotkiewicz, P. & Skolnick, J. *Journal of Computational Chem-*  
773 *istry* **29**, 1460–1465 (2008).  
774 [29] Hauser, M. *et al. Bioinformatics* **32**, 1323–1330 (2016).  
775 [30] Farrar, M. *Bioinformatics* **23**, 156–161 (2007).  
776 [31] Zhao, M. *et al. PLOS One* **8**, e82138 (2013).  
777 [32] Eddy, S. R. *PLOS Comput Biol* **7**, e1002195 (2011).  
778 [33] Söding, J. & Remmert, M. *Curr Opin Struct Biol* **21**, 404–411  
779 (2011).  
780 [34] Daily, J. *BMC Bioinform* **17**, 81 (2016).  
781 [35] Hung, L.-H. & Samudrala, R. *Bioinformatics* **30**, 1774–1776  
782 (2014).  
783 [36] Van den Oord, A. *et al. Adv Neur Inf Proc Syst (NIPS)* **30**  
784 (2017).  
785 [37] Varadi, M. *et al. Nucleic Acids Res* **50**, D439–D444 (2022).  
786 [38] Jiang, P. & Singh, M. *Bioinformatics* **26**, 1105–1111 (2010).  
787 [39] Altschul, S. F. *et al. J Mol Biol* **215**, 403–410 (1990).  
788 [40] Jumper, J. *et al. Nature* **596**, 583–589 (2021).  
789 [41] Mariani, V. *et al. Bioinformatics* **29**, 2722–2728 (2013).  
790 [42] Jiménez-Moreno, A. *et al. J Struct Biol* **213**, 107712 (2021).  
791 [43] Lafita, A. *et al. PLOS Comput Biol* **15**, e1006791 (2019).  
792 [44] Shindyalov, I. N. & Bourne, P. E. *Protein Eng Des Sel* **11**,  
793 739–747 (1998).  
794 [45] Durairaj, J. *et al. Bioinformatics* **36**, i718–i725 (2020).  
795 [46] Mizuguchi, K. *et al. Protein Science* **7**, 2469–2471 (1998).  
796 [47] Mirdita, M. *et al. Bioinformatics* **35**, 2856–2858 (2019).  
797 [48] Rose, A. S. *et al. Bioinformatics* **34**, 3755–3758 (2018).  
798 [49] Richardson, J. S. *Nat. Struct. Biol.* **7**, 624–625 (2000).  
799 [50] Zhang, Y. & Skolnick, J. *Nucleic Acids Res* **33**, 2302–2309  
800 (2005).
